# Supplementary material for: The cold way for glutathione biosynthesis in the psychrophile Pseudoalteromonas haloplanktis. Redundancy and reaction rates
Source: Royal Society of Chemistry journal article supplement (doi:10.1039/c6ra15706h), 2016-01-01
Supplement: c6ra15706h1.pdf [file c6ra15706h1.pdf]

## Electronic supplementary information

**Title.** The cold way for glutathione biosynthesis in the psychrophile *Pseudoalteromonas haloplanktis*. Redundancy and reaction rates

**Authors.** A. Albino, A. De Angelis, R. Rullo, C. Maranta, A. Capasso, M. R. Ruocco, F. Sica and E. De Vendittis.

**Table S1** Primers for the amplification of a DNA segment containing the coding sequence of the *Ph-gshA I* gene

| Oligonucleotide sequences <sup>a</sup> |                                                                                     |
|----------------------------------------|-------------------------------------------------------------------------------------|
| Direct primer                          | 5'd-T <sub>-15</sub> CGAGGAAGTATCATATG•GCA•ACA•CAT•GAT <sub>15</sub> -3'            |
| Reverse primer                         | 5'd-C <sub>1593</sub> TTAAAACTAACTATCTC•GAG•AGG•ATC•AAA•ATA•AGC <sub>1558</sub> -3' |

<sup>a</sup> Numbering begins from starting codon, italicized; underlined letters indicate mismatches for creating the *NdeI* and *XhoI* restriction sites.

**Table S2** Primers for RT-PCR amplification of gene segments from *P. haloplanktis* <sup>a</sup>

| Gene               | Direct primer                      | Reverse primer                    |
|--------------------|------------------------------------|-----------------------------------|
| <i>Ph-gshA I</i>   | 5'd-ACG•GCA•ACC•TTG•ACG•ATT•AC-3'  | 5'd-CAT•CTG•TTG•GTG•TTT•CAC•CG-3' |
| <i>Ph-gshA II</i>  | 5'd-CAC•ACT•TAT•CGT•CGT•GGG•CT-3'  | 5'd-ACC•CCT•GCC•AAA•AGC•TAT•CC-3' |
| <i>Ph-gshB</i>     | 5'd-AGA•TCC•CCC•TTT•TGA•TAC•CG-3'  | 5'd-AAA•GTG•TCG•GGC•GTG•TAT•TC-3' |
| <i>Ph-sod</i>      | 5'd-AAT•GGT•TTG•ATC•CCA•GGC•ACT-3' | 5'd-TAA•ACA•CGC•CAC•CGT•CTG•AT-3' |
| <i>Ph-rRNA 16S</i> | 5'd-GGT•AAT•ACG•GAG•GGT•GCG•AG-3'  | 5'd-TCT•CGC•TTA•ACA•AAC•CGC•CT-3' |

<sup>a</sup> Primer Blast ([http://www.ncbi.nlm.nih.gov/tools/primer-blast/index.cgi?LINK\\_LOC=BlastHome](http://www.ncbi.nlm.nih.gov/tools/primer-blast/index.cgi?LINK_LOC=BlastHome)) and Primer 3 (<http://bioinfo.ut.ee/primer3-0.4.0/>) softwares were used for primer designing. Each primer was controlled by <http://eu.idtdna.com/calc/analyzer> software for avoiding dimer and hairpin formation.

# Fig. S1

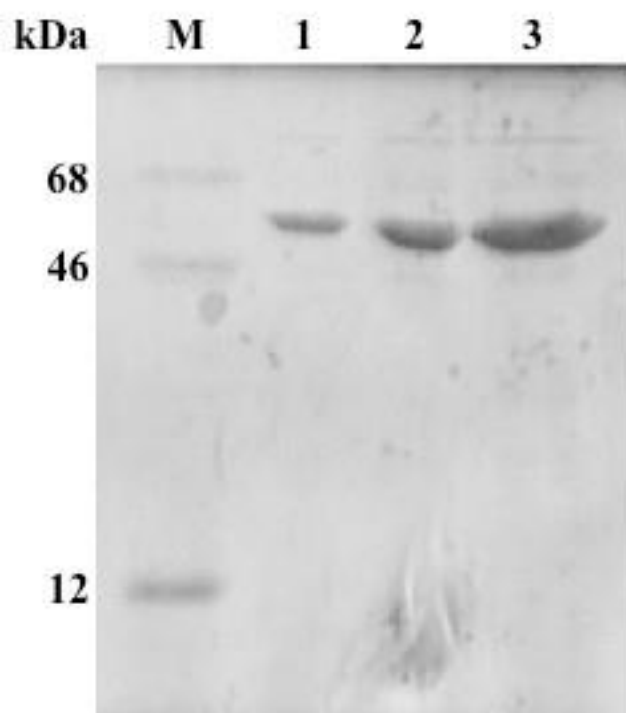

**Figure S1** SDS-PAGE of rPhGshA I

Increasing amounts (1, 2.5 and 5  $\mu$ g) of purified rPhGshA I (*lanes 1-3*) were analysed on a 12% polyacrylamide gel. Migration of molecular mass protein standards (*lane M*) is reported on the left.

## Fig. S2

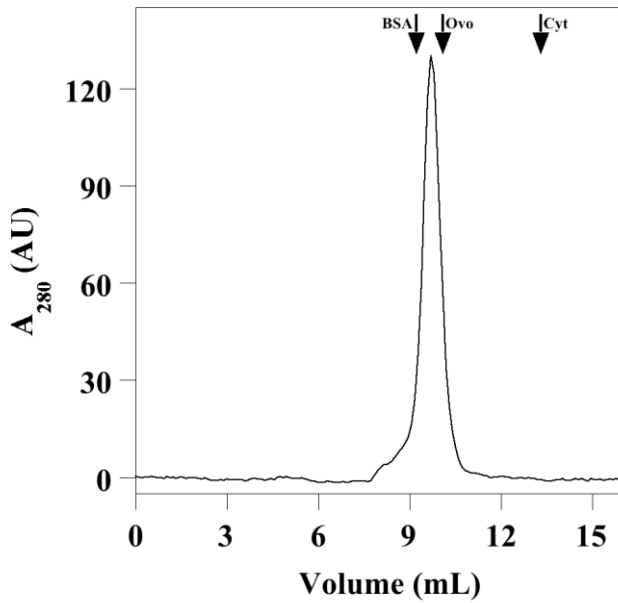

**Figure S2** Size exclusion chromatography profile of *rPhGshA I* under non-denaturing conditions. A sample of *rPhGshA I* (100  $\mu$ g in 200  $\mu$ l) was loaded on a Superdex<sup>TM</sup> 75 10/300 GL column. Elution was realised with 20 mM Tris•HCl buffer, pH 7.8, containing 100 mM KCl at a flow rate of 0.5 mL min<sup>-1</sup>. The column was calibrated with bovine serum albumin (BSA, Mr 68,000), ovalbumin (Ova, Mr 46,000) and cytochrome *c* (Cyt, Mr 12,400); the corresponding elution positions are indicated by arrows on the top. Absorbance at 280 nm ( $A_{280}$ ) was continuously monitored and expressed as arbitrary units.

# Fig. S3

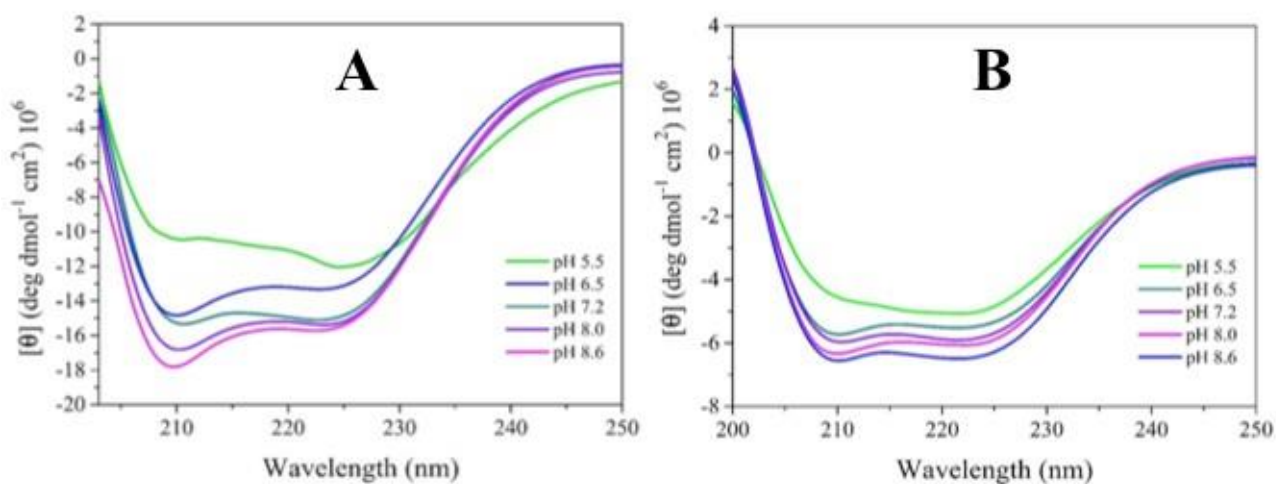

**Figure S3** Far-UV CD spectra of rPhGshA I (A) and rPhGshA II (B) at different pHs

Spectra were collected at 20°C; enzymes were dissolved at 0.2 mg mL<sup>-1</sup> in 10 mM buffers (sodium phosphate, pH range 5.5 – 8.0 or Tris•HCl, pH 8.6) supplemented with MKT solution.
